# Supplementary material for: Regenerating infected bone defects with osteocompatible microspheres possessing antibacterial activity
Source: Royal Society of Chemistry journal article supplement (doi:10.1039/c8bm00903a), 2018-11-09
Supplement: c8bm00903a1.pdf [file c8bm00903a1.pdf]

## Supplementary

### Regenerating infected bone defect with osteocompatible microspheres possessing antibacterial activity

Peng-Fei Wei<sup>a</sup>, Zuo-Ying Yuan<sup>a</sup>, Wei Jing<sup>a</sup>, Bin-Bin Guan<sup>b</sup>, Zi-Hao Liu<sup>c</sup>, Xu Zhang<sup>c</sup>, Jian-Ping Mao<sup>d</sup>, Da-Fu Chen<sup>e</sup>, Qing Cai<sup>a,\*</sup> and Xiao-Ping Yang<sup>a,\*</sup>

<sup>a</sup> State Key Laboratory of Organic-Inorganic Composites; Beijing Laboratory of Biomedical Materials; Beijing University of Chemical Technology, Beijing 100029, P.R. China.

<sup>b</sup> Department of Stomatology, Tianjin Medical University General Hospital, Tianjin 300052, P.R. China.

<sup>c</sup> Department of Endodontics, School and Hospital of Stomatology, Tianjin Medical University, Tianjin 300070, P.R. China.

<sup>d</sup> Department of Spine Surgery, Beijing Jishuitan Hospital, Beijing 100035, P.R. China.

<sup>e</sup> Laboratory of Bone Tissue Engineering, Beijing Research Institute of Traumatology and Orthopaedics, Beijing Jishuitan Hospital, Beijing 100035, P.R. China.

\* Corresponding to:

Prof. Qing Cai, Tel and Fax: (86)-10-64412084; E-mail: caiqing@mail.buct.edu.cn (Q.Cai)

Prof. Xiaoping Yang, Tel&Fax: (86)-10-64412084; E-mail: yangxp@mail.buct.edu.cn (X.Yang)

**Table S1** Primers designed for selected genes in relation to osteogenic differentiation of BMSCs, as well as for TNF and IL-6 genes to determine the in vivo anti-infection effect of M+D+Ag+B microspheres.

| gene  | forward primer (5'–3') | reverse primer (5'–3') |
|-------|------------------------|------------------------|
| RUNX2 | TCCAGACCAGCAGCACTCC    | TCAGCGTCAACACCATCATTC  |
| OPN   | AATGAAGGGCCCTGAGC      | GCCAGTTCTGCAAGGAAGC    |
| COL-I | GCATGGCCAAGAAGACATCC   | CCTCGGGTTTGGACGTCTC    |
| OCN   | AACGGTGGTGCCATAGATGC   | AGGACCCTCTCTCTGCTCAC   |
| TNF   | GGCCAATGGCATGGATCTCA   | ATGGCAAATCGGCTGACGG    |
| IL-6  | ACTTCCAGCCAGTTGCCTTCT  | GGTCTGTTGTGGGTGGTATCCT |
| 18S   | AATGAAGGGCCCTGAGC      | GCCAGTTCTGCAAGGAAGC    |

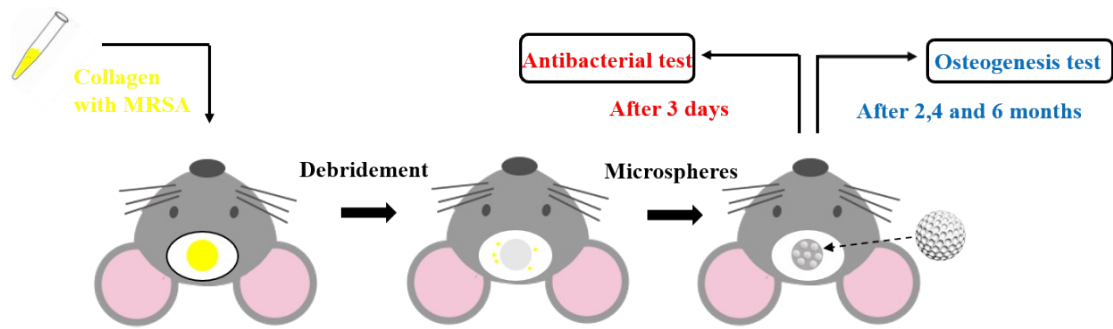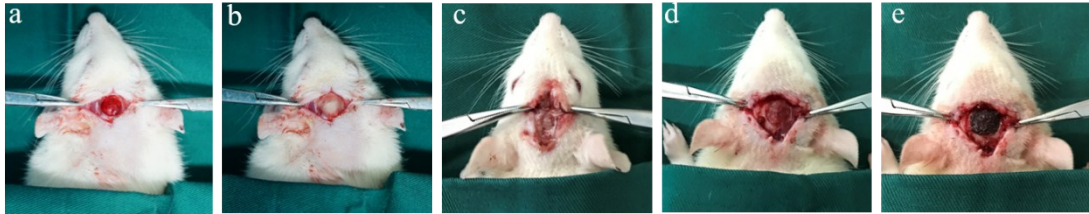

**Fig. S1** Schematic process of generating infected bone defects. (a) The critical-sized circular defect was created by means of 8 mm-diameter trephine burr on the central region of the calvarium. (b) A resorbable collagen sponge pre-soaked with of *S. aureus* suspension ( $10^7$  CFU in 100  $\mu$ L of sterile normal saline) was inserted into the defect. (c) Obvious infection was clinically observed after one week. (d) Debridement was performed and infectious tissue was removed. (e) Microspheres were implanted into the infected defects, and the incisions were closed again.

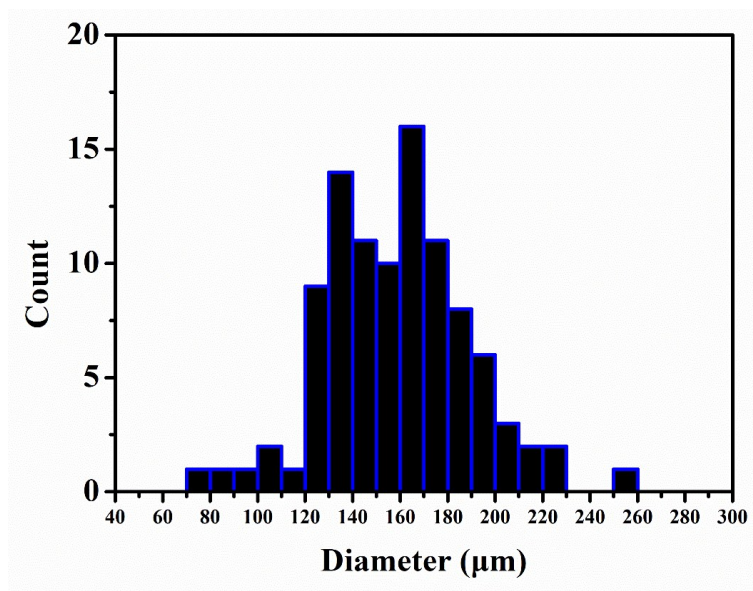

**Fig. S2** The statistical analysis on size distribution of M+D+Ag+B microspheres basing on multiple SEM images with 100 microspheres being measured.

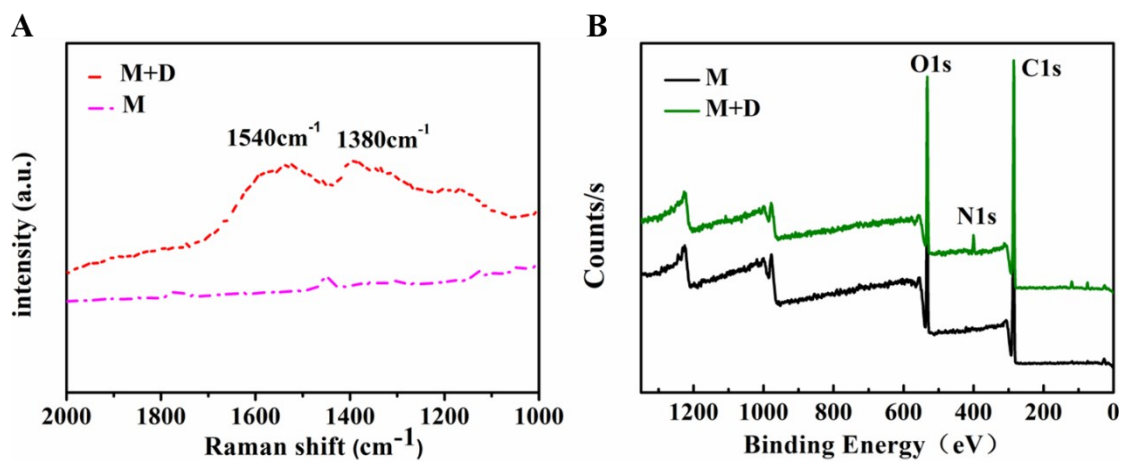

**Fig. S3** Comparison between (A) Raman spectra and (B) XPS profiles of prepared M and M+D microspheres.

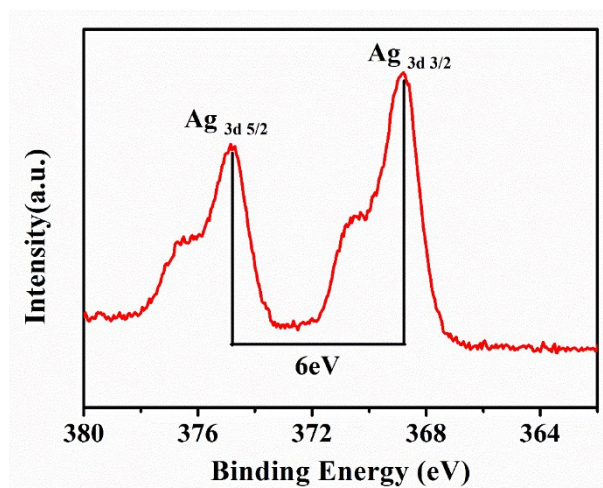

**Fig. S4** The enlarged Ag<sub>3d</sub> signal composed of two individual peaks at 368 eV and 374 eV being shown.

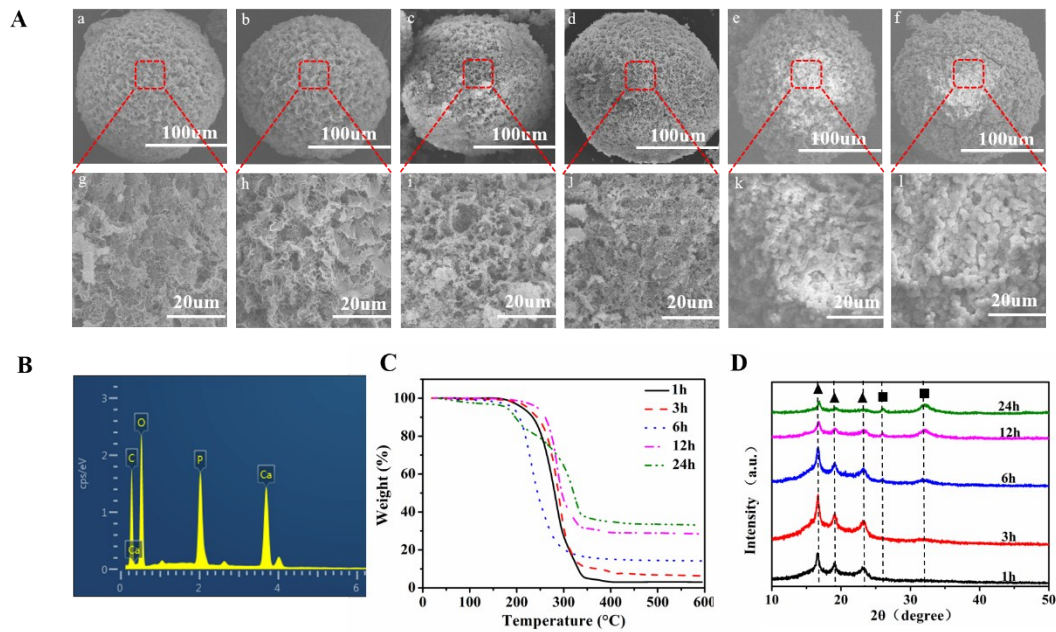

**Fig. S5** (A) SEM micrographs of microspheres biom mineralized for 0 h (a, g), 1 h (b, h), 3 h (c, i), 6 h (d, j), 12 h (e, k) and 24 h (f, l). (B) EDS of microspheres biom mineralized for 12 h. (C) TGA curves and (D) XRD patterns of microspheres biom mineralized for different times. In (D), ▲ indicates peaks assigned to PLLA-PEG-PLLA copolymer and ■ indicates signals assigned to HA.

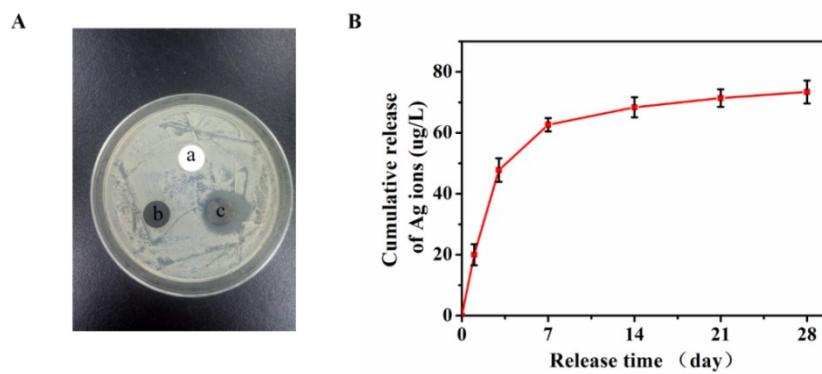

**Fig. S6** (A) antibacterial activity to *S.aereus* of M microspheres (a), M+D+B microspheres (b) and M+D+Ag+B microspheres, together with (B) the release behavior of silver ion from the M+D+Ag+B microspheres.

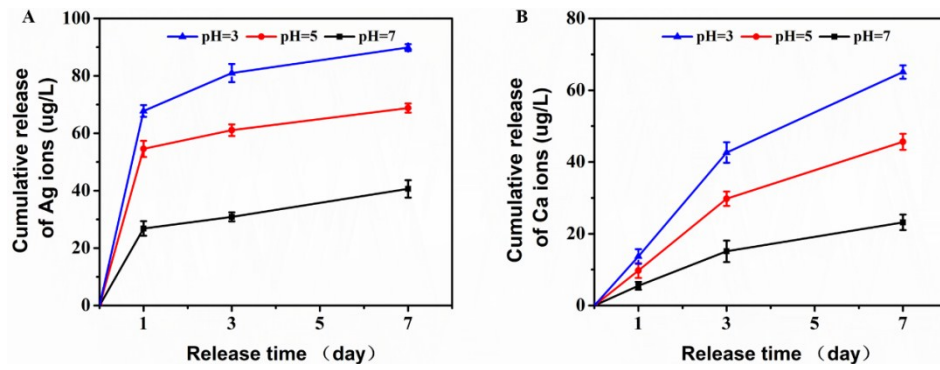

**Fig. S7** The release behaviors of (A) silver and (B) calcium ions from M+D+Ag+B microspheres under different pH values at 37°C.

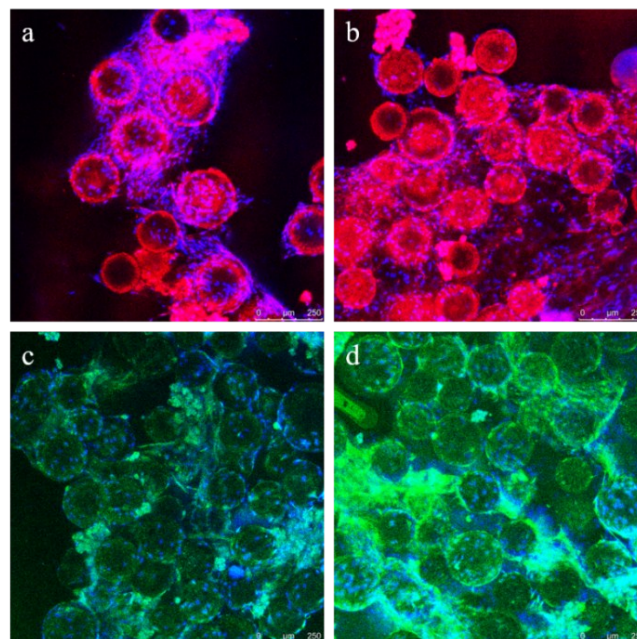

**Fig. S8** Immunofluorescent staining to show the abundant expressions of OPN (a, b) and OCN (c, d) for BMSCs cultured on M+D+B (a, c) and M+D+Ag+B (b, d) microspheres for 14 days.

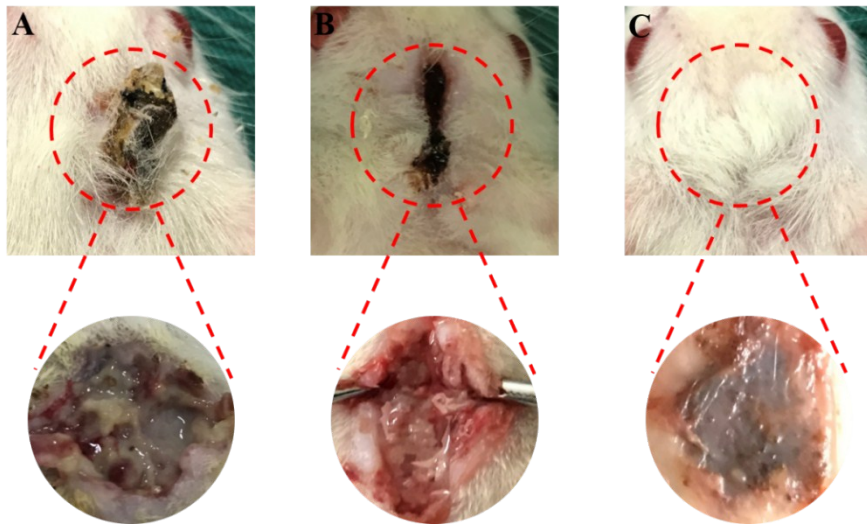

**Fig. S9** Macroscopic observations to show the infected cranial defect areas of SD rats one month post-operation in control group (A), M+D+B microsphere-filled group (B) and M+D+Ag+B microsphere-filled group (C).

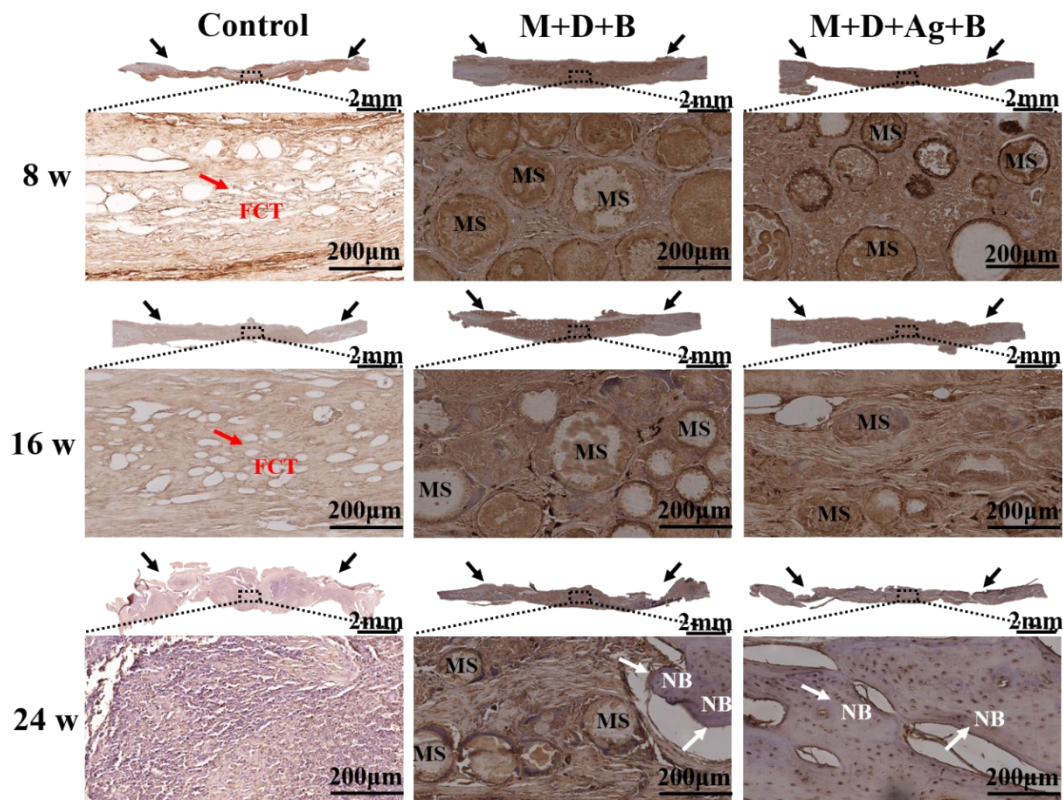

**Fig. S10** Immunohistochemical staining on OPN expression to evaluate the regeneration of infected bone defects at 8, 16 and 24 weeks post-operation for the control group and groups filled with M+D+B or M+D+Ag+B microspheres. Red arrows indicate the fibrous connective tissue (FCT), MS represents the location of residual microspheres, and white arrows indicate the newly formed bone (NB).

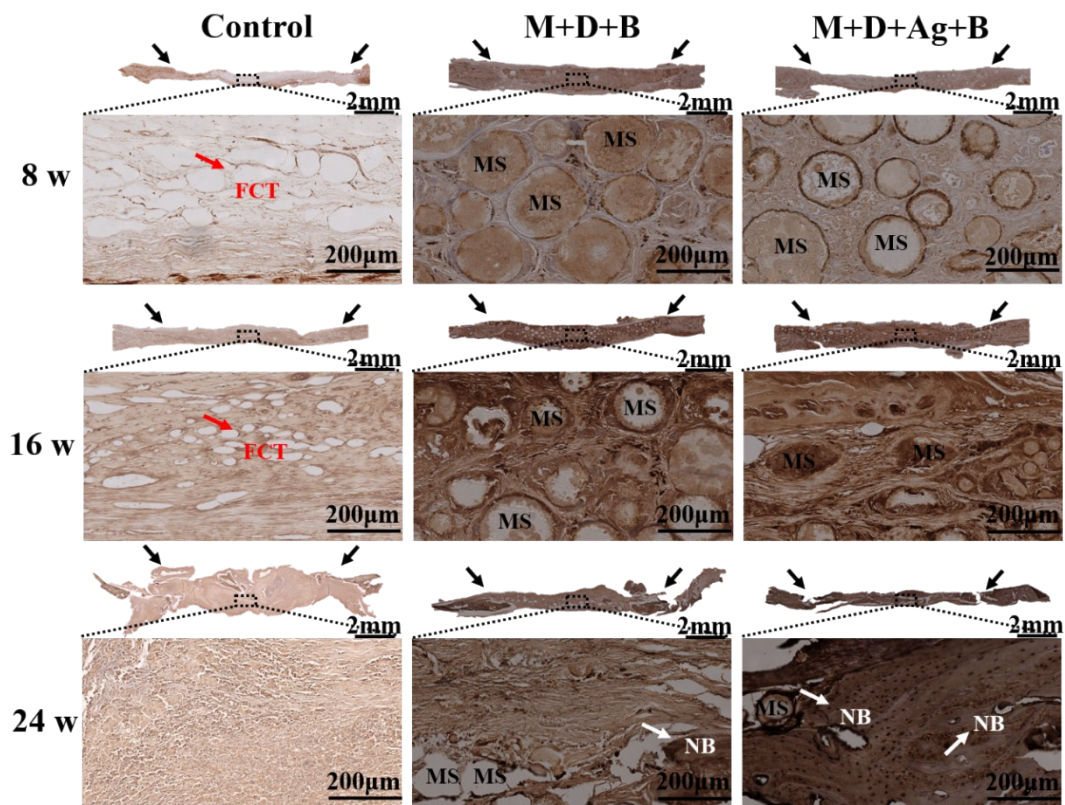

**Fig. S11** Immunohistochemical staining on OCN expression to evaluate the regeneration of infected bone defects at 8, 16 and 24 weeks post-operation for the control group and groups filled with M+D+B or M+D+Ag+B microspheres. Red arrows indicate the fibrous connective tissue (FCT), MS represents the location of residual microspheres, and white arrows indicate the newly formed bone (NB).
